# Supplementary material for: Chronic Hypoxia Decreases Endothelial Connexin 40, Attenuates Endothelium‐Dependent Hyperpolarization–Mediated Relaxation in Small Distal Pulmonary Arteries, and Leads to Pulmonary Hypertension
Source: PubMed Central journal article supplement — J Am Heart Assoc. 2020 Dec 12;9(24):e018327. doi: 10.1161/JAHA.120.018327 (PMC7955394; doi:10.1161/jaha.120.018327), 2020-12-12
Supplement: JAH3-9-e018327-s001.pdf [file JAH3-9-e018327-s001.pdf]

# **SUPPLEMENTAL MATERIAL**

## Data S1.

### Supplemental Methods

#### **Animals**

All experimental protocols used in this study were approved by the Institutional Animal Care and Use Committee (IACUC) at The University of Arizona (UA) and the University of California, San Diego (UCSD) and conformed to the Guide for the Care and Use of Laboratory Animals published by the National Institutes of Health. C57BL/6J male mice were purchased from Jackson Laboratory (Bar Harbor, ME, USA). Systemic Cx40 knockout (KO) mice were kindly provided by Dr. Janis Burt from the UA<sup>31</sup>, and C57BL/6J were used as a wild-type (Wt) control. Tie2-driven Cx40 Wt overexpressing (Cx40TG) mice and Tie2-driven Cx40 negative mutant overexpressing mice (Cx40-NM) were provided by Dr. Anthony Ashton from the University of Sydney<sup>32</sup>. Heterozygous parents were used as a breeder of Cx40TG mice, and homozygous parents were used for Cx40<sup>NM</sup> breeders. Homo- and heterozygosity was determined by Cx40 copy number. Mice without Tie2-Cx40TG gene or Tie2-Cx40-NM gene were used as Wt control. These mice were bred in the animal facility of the UA and UCSD. Male mice were used for experiments in this study. The primer sequence information for genotyping and copy number assessment is listed in **Table S1**. Mice were randomly allocated to experimental groups, and hypoxia-induced PH was induced by placing mice (8 weeks old) in the normobaric hypoxic chamber (10% O<sub>2</sub>) for 4 weeks. Sugen-hypoxia PH mouse model (SuHx) was generated by injections of Sugen 5416 (20mg/kg, once a week) during the 4 weeks of hypoxic exposure. Cx40 overexpression was achieved by a single intravenous injection (i.v.) of CMV-Cx40 adenovirus<sup>33</sup> (Cx40-Adv) or control Adv (Cont-Adv, Adv vector without gene insertion) at  $3 \times 10^9$  pfu/mouse. Three weeks after hypoxic exposure, mice received either Cx40-Adv or Cont-Adv and kept in the hypoxic chamber for an additional one week before experimentation. Lung dissection was performed under anesthesia with sodium pentobarbital (130 mg/kg, i.p.), and all efforts were made to minimize pain.

#### ***Isometric tension measurement in pulmonary arterial ring***

Isometric tension in the PAs was measured and recorded as described previously<sup>34</sup>. Briefly, a large proximal PA (2<sup>nd</sup> order) and small distal PA (4<sup>th</sup>-5<sup>th</sup> order) were dissected from a left superior lobe and cut into 1-mm segments. The PA rings were mounted on a myograph (DMT-USA, Inc. Ann Arbor, MI, USA) using thin stainless wires (20  $\mu$ m in diameter), and the resting tension was set at 0.1 g. PAs were allowed to equilibrate for 45 min with intermittent washes every 15 min. After equilibration, each PA ring was contracted by treatment with PGF<sub>2 $\alpha$</sub>  to generate a similar contraction level in all groups. Acetylcholine (ACh) or sodium nitroprusside (SNP, an NO donor) was administered in a dose-dependent manner (1 nmol/l to 100  $\mu$ mol/l), and the degree of vasodilatation was described as a percentage (%) decrease of PGF<sub>2 $\alpha$</sub> -induced contraction.

#### ***Right ventricular systolic pressure (RVSP) measurement***

Mice were anesthetized with isoflurane (1%), and the catheter was inserted into the right external jugular vein and proceeded into the right ventricle (RV). Right ventricular pressure (RVP) was measured and recorded using an MPVS Ultra system (Millar Inc. Houston, TX, USA), as described in our previous manuscript<sup>34</sup>. RVSP, a surrogate measure of pulmonary artery systolic pressure, was measured and compared between

the groups. At the end of the experiment, the heart was dissected. The free wall of the RV was then isolated from the left ventricle and septum (LV+S) and weighed separately. The Fulton index was calculated as the weight ratio of RV/(LV+S).

### ***Isolation of mouse pulmonary ECs***

Mouse pulmonary ECs (MPECs) were isolated using a method previously described<sup>34</sup>. The purity of MPECs was evaluated by Dil-acLDL uptake and Bandeiraea Simplicifolia lectin-FITC (BS-I) staining. Efficient isolation yields approximately  $4 \times 10^4$  MPECs per mouse with over 80% purity.

### ***RNA sequencing***

mRNA from MPECs was isolated using a miRNeasy Mini Kit (QIAGEN, Chatsworth, CA, USA). Frozen RNA samples ( $n_{\text{mice}} = 6$  per group) were sent to QIAGEN for RNA sequencing. At the company, RNA samples were quantified, and sequencing libraries were generated using Illumina TruSeq stranded total RNA library preparation kit with rRNA depletion (Illumina, San Diego, CA, USA). The libraries' size distribution was validated, and the quality was inspected on a Bioanalyzer 2100 or BioAnalyzer 4200 TapeStation (Agilent Technologies, Santa Clara, CA, USA). Paired end-75bp read sequencing was conducted using an Illumina NextSeq500 (Illumina Inc.). The data analysis was performed using the Tuxedo software package by QIAGEN. The components of QIAGEN NGS data analysis pipeline for RNA-seq include Bowtie2 v.2.2.2, Tophat v2.0.11, and Cufflinks v2.2.1.

### ***Western blot analysis***

Protein levels were analyzed using SDS-PAGE separation and electrophoretic transfer to nitrocellulose membranes. Primary antibodies used in this study are listed in **Table S1**.

### ***GJ activity measurement***

Human pulmonary ECs were plated in a 12-well plate. Next day, the plate was placed in a hypoxic incubator (3% O<sub>2</sub>) or regular normoxic incubator (21% O<sub>2</sub>) and cultured for 48 hours. Dye transfer assay was performed as described in our previous manuscript<sup>35</sup>. Briefly, Lucifer yellow (0.5 mg/ml) was added to each well at the end of 48 hours incubation, and the confluent cells were scratched by a scalpel in the middle of the well to allow dye to get into cells at the edge of the scrape. The dye solution was left for 20 min in the well, and then cells were washed and fixed. Images of dye transfer were captured using an EVOS FL Auto Imaging System (Thermo-Fisher Scientific, Waltham, MA, USA). The distance of dye transfer from the scraping site to the farthest site of cells showing visual uptake of dye was measured using Image Pro-Plus 7.0 software (Media Cybernetics, Inc. Rockville, MD, USA). The data were normalized to the averaged distance of dye transfer in normoxia-exposed ECs.

### ***Systemic arterial pressure and heart rate measurement***

Mice were anesthetized with isoflurane (1%), and the catheter was inserted into the right carotid artery. Systemic arterial pressure and heart rate were measured using an MPVS Ultra system and data were collected using PowerLab data acquisition system

(Sydney, Australia).

### ***Quantification of muscularization in pulmonary vessels***

Lungs were inflated, perfused with OTC compound, and frozen. Lung sections (6  $\mu\text{m}$  in thickness) were stained with antibodies against von Willebrand factor (vWF, an EC marker, conjugated with Alexa488) and  $\alpha$ -smooth muscle cell actin antigen ( $\alpha$ SMA, a SMC marker, conjugated with Cy3). The lung image was taken with a Nikon Eclipse Ti-E 3D Deconvolution microscope (Nikon Corp. Tokyo, Japan). Vessels sized between 20  $\mu\text{m}$  and 70  $\mu\text{m}$  in the entire lung were scored based on  $\alpha$ SMA-staining: highly-muscularized = >50% of  $\alpha$ SMA-staining, partially-muscularized = 1% <  $\alpha$ SMA-staining < 50%, non-muscularized = 0% of  $\alpha$ SMA-staining.

### ***Lung angiograph***

Pulmonary angiography was conducted as previously described<sup>34</sup>. The lungs were perfused with 0.5 mL/min for 2 min through the pulmonary artery (PA) and fixed at 4°C overnight. Then the lungs filled with Microfil were bathed in serial concentrations of ethanol, placed in methyl salicylate, and photographed with a digital camera (MD600E, Amscope, Irvine, CA, USA). We made binary images using NIH ImageJ 1.47v software on the peripheral pulmonary vasculature (the areas between the edge of the lung and 1 mm inside from the edge of the lung) using Photoshop CS software (Adobe Inc. San Jose, CA, USA); the images were then skeletonized for analyzing the number of vessel branches, the number of junctions and the total length. These data were normalized by the area selected in each lung image.

### ***Statistics***

We conducted data analysis in a blinded fashion wherever possible and set proper controls for every experimental plan. The mouse numbers and independent experiment numbers are described in the figure legends. Statistical analysis was performed using GraphPad Prism 7.04 (La Jolla, CA, USA). Data are presented as mean  $\pm$  SEM. After the data passed a normality test, the two-tailed Student's *t*-test was used for comparisons of two groups, and one-way ANOVA was used for multiple comparisons. If the data did not pass the normality test, a non-parametric test (Mann-Whitney for two groups, Kruskal-Wallis for multiple comparisons) was used. Statistical comparison between dose-response curves was made by two-way ANOVA with Bonferroni post hoc test. Differences were considered to be statistically significant when  $P < 0.05$ . In RNAseq data, *q*-values are obtained from adjusted *p*-values using the Benjamini-Hochberg False Discovery Rate approach to correct for multiple testing. The fold changes with *q*-values below 0.05 are considered significant.

**Table S1. Major Resources.****Animals (in vivo studies)**

| <b>Species</b> | <b>Vendor or Source</b>       | <b>Background Strain</b>  | <b>Sex</b> | <b>Persistent ID / URL</b>                                                                                                                                                                                   |
|----------------|-------------------------------|---------------------------|------------|--------------------------------------------------------------------------------------------------------------------------------------------------------------------------------------------------------------|
| Mouse          | Jackson Laboratory, (ME, USA) | C57BL/6J, Stock #: 000664 | M          | <a href="http://jax.org/jax-mice-and-services/find-and-order-jax-mice/most-popular-jax-mice-strains/aged-b6">jax.org/jax-mice-and-services/find-and-order-jax-mice/most-popular-jax-mice-strains/aged-b6</a> |

**Genetically Modified Animals**

|                                     | <b>Species</b> | <b>Vendor or Source</b>                | <b>Background Strain</b> | <b>Other Information</b>                             | <b>Persistent ID / URL</b>                                                                              |
|-------------------------------------|----------------|----------------------------------------|--------------------------|------------------------------------------------------|---------------------------------------------------------------------------------------------------------|
| <b>Cx40<sup>-/-</sup> (Parent)</b>  | Mouse          | Jackson Laboratory, (ME, USA)          | C57BL/6                  | Cx40 knockout mice<br>Stock #: 025697                | <a href="https://www.jax.org/strain/025697">https://www.jax.org/strain/025697</a>                       |
| <b>Cx40<sup>Tg/+</sup> (Parent)</b> | Mouse          | University of Sydney, (NSW, Australia) | C57BL/6                  | Tie2-Cx40 (wild type) overexpressing mice (hetero)   | <a href="https://www.ncbi.nlm.nih.gov/pubmed/23471232">https://www.ncbi.nlm.nih.gov/pubmed/23471232</a> |
| <b>Cx40-NM</b>                      | Mouse          | University of Sydney, (NSW, Australia) | C57BL/6                  | Tie2-Cx40 negative mutant overexpressing mice (homo) | <a href="https://www.ncbi.nlm.nih.gov/pubmed/25547341">https://www.ncbi.nlm.nih.gov/pubmed/25547341</a> |

**Antibodies**

| <b>Target antigen</b> | <b>Vendor or Source</b>                 | <b>Catalog #</b> | <b>Dilution Rate</b> | <b>Persistent ID / URL</b>                                                                                                                                                                |
|-----------------------|-----------------------------------------|------------------|----------------------|-------------------------------------------------------------------------------------------------------------------------------------------------------------------------------------------|
| Cx37                  | Thermo-Fisher Scientific (MA, USA)      | 424400           | 1:500                | <a href="https://www.thermofisher.com/antibody/product/Connexin-37-Antibody-Polyclonal/42-4400">https://www.thermofisher.com/antibody/product/Connexin-37-Antibody-Polyclonal/42-4400</a> |
| Cx40                  | Santa Cruz Biotechnology Inc. (TX, USA) | sc-20466         | 1:2000               | <a href="https://www.scbt.com/p/connexin-40-antibody-c-20?requestFrom=search">https://www.scbt.com/p/connexin-40-antibody-c-20?requestFrom=search</a>                                     |
| Cx43                  | Thermo-Fisher Scientific (MA, USA)      | 710700           | 1:1000               | <a href="https://www.thermofisher.com/antibody/product/Connexin-43-Antibody-Polyclonal/71-0700">https://www.thermofisher.com/antibody/product/Connexin-43-Antibody-Polyclonal/71-0700</a> |
| IK                    | Santa Cruz Biotechnology Inc. (TX, USA) | sc-365265        | 1:1000               | <a href="https://datasheets.scbt.com/sc-365265.pdf">https://datasheets.scbt.com/sc-365265.pdf</a>                                                                                         |
| Actin                 | Santa Cruz Biotechnology Inc. (TX, USA) | sc-1616          | 1:4000               | <a href="https://www.scbt.com/p/actin-antibody-i-19?requestFrom=search">https://www.scbt.com/p/actin-antibody-i-19?requestFrom=search</a>                                                 |
| CD31                  | BD Biosciences (CA, USA)                | 553370           | 1:500                | <a href="https://www.bdbiosciences.com/us/solrSearch?text=553370">https://www.bdbiosciences.com/us/solrSearch?text=553370</a>                                                             |
| vWF                   | Santa Cruz Biotechnology Inc. (TX, USA) | sc365721-488     | 1:500                | <a href="https://www.scbt.com/p/vwf-antibody-c-12?requestFrom=search">https://www.scbt.com/p/vwf-antibody-c-12?requestFrom=search</a>                                                     |
| αSMA                  | Sigma Aldrich, (MO, USA)                | C6198            | 1:1000               | <a href="https://www.sigmaaldrich.com/catalog/product/sigma/c6198?lang=en&amp;region=US">https://www.sigmaaldrich.com/catalog/product/sigma/c6198?lang=en&amp;region=US</a>               |

### Cultured Cells

| Name  | Vendor or Source                 | Catalog # | Lot# | Sex (F, M, or unknown) |
|-------|----------------------------------|-----------|------|------------------------|
| HPAEC | Cell Applications Inc. (CA, USA) | 302-05a   | 2439 | F                      |

### Chemicals

| Description                        | Source                                  | Catalog #      |
|------------------------------------|-----------------------------------------|----------------|
| Medium 199                         | Thermo-Fisher Scientific, (MA, USA)     | MT10060-CV     |
| Streptomycin/penicillin            | Thermo-Fisher Scientific, (MA, USA)     | MT-30-002-CI   |
| Trypsin/EDTA                       | Thermo-Fisher Scientific, (MA, USA)     | MT25052-CI     |
| Endothelial Cell Growth Supplement | Thermo-Fisher Scientific, (MA, USA)     | 356006         |
| Fetal Bovine Serum                 | Thermo-Fisher Scientific, (MA, USA)     | MT35010CV      |
| Iron-Supplemented Calf Serum       | Thermo-Fisher Scientific, (MA, USA)     | SH30072.04     |
| Matrigel                           | Thermo-Fisher Scientific, (MA, USA)     | 356237         |
| Dynabeads ® Sheep Anti-Rat IgG     | Thermo-Fisher Scientific, (MA, USA)     | 11035          |
| Collagenase I                      | Worthington Biochemical Corp. (NJ, USA) | LS004196       |
| Dispase II                         | Worthington Biochemical Corp. (NJ, USA) | LS02109        |
| Sodium pentobarbital               | Henry Schein( NY, USA)                  | VINV-CIII-0001 |
| Dil-acLDL                          | Thermo-Fisher Scientific, (MA, USA)     | L3484          |
| Lectin-FITC                        | Sigma Aldrich (MO, USA)                 | L9381          |
| miRNeasy Mini Kit                  | Qiagen (CA, USA)                        | 217004         |
| RT <sup>2</sup> First Strand Kit   | Qiagen (CA, USA)                        | 330404         |
| PGF <sub>2α</sub>                  | Sigma Aldrich (MO, USA)                 | P0424-5 mg     |
| Acetylcholine                      | Sigma Aldrich, (MO, USA)                | A9101          |
| Sodium Nitroprusside               | Sigma Aldrich, (MO, USA)                | 71778          |
| L-NAME                             | Cayman Chemical (MI, USA)               | 80210          |
| indomethacin                       | Sigma Aldrich, (MO, USA)                | I7378          |
| Lucifer Yellow                     | Thermo-Fisher Scientific, (MA, USA)     | L453           |
| Microfil                           | Flow Tech Inc. (MA, USA)                | MV-122         |
| Isoflurane                         | Henry Schein( NY, USA)                  | 1169567762     |
| Other general chemicals            | Sigma Aldrich, (MO, USA)                |                |

**Table S2. Primers used for genotyping and copy number assessment.**

| Strain              | Gene                     | Forward                        | Reverse               |
|---------------------|--------------------------|--------------------------------|-----------------------|
| <b>Genotype</b>     |                          |                                |                       |
| Cx40 <sup>-/-</sup> | Wt                       | TGGAGCCACAGTTGCAATGGT          | TCTCTGACTCCGAAAGGCAAG |
|                     | Cx40 <sup>-/-</sup>      |                                | GCACGAGACTAGTGAGACGTG |
| Cx40 <sup>TG</sup>  | Cx40 <sup>TG</sup> -IRES | CCAGGGCACCCCTACTCAACA <u>A</u> | AGGGGCGGATCTCGAATCAA  |
| Cx40 <sup>NM</sup>  | Cx40 <sup>NM</sup> -IRES | CCAGGGCACCCCTACTCAAC <u>G</u>  | AGGGGCGGATCTCGAATCAA  |
| <b>Copy number</b>  |                          |                                |                       |
| Cx40                | Cx40                     | CCACAGTCATCGGCAAGGTC           | CTGAATGGTATCGCACCGGAA |
| GAPDH               | GAPDH                    | TGACCTCAACTACATGGTCTACA        | CTTCCCATTCTCGGCCTTG   |

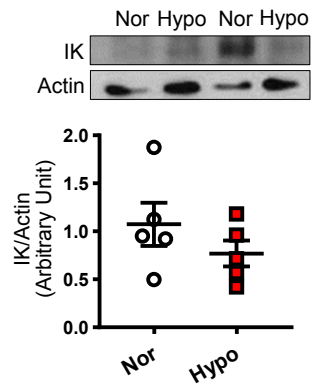

**Figure S1.** IK channel protein levels in mouse pulmonary endothelial cells (MPECs) isolated from normoxic control mice (Nor,  $n_{\text{mice}}=5$ ) and hypoxia-exposed mice (Hypo,  $n_{\text{mice}}=5$ ) determined by Western Blot. Data are mean  $\pm$  SEM. Unpaired Student's *t*-test (2-tailed) was used for comparisons of two experimental groups and there is no significant difference between two groups.



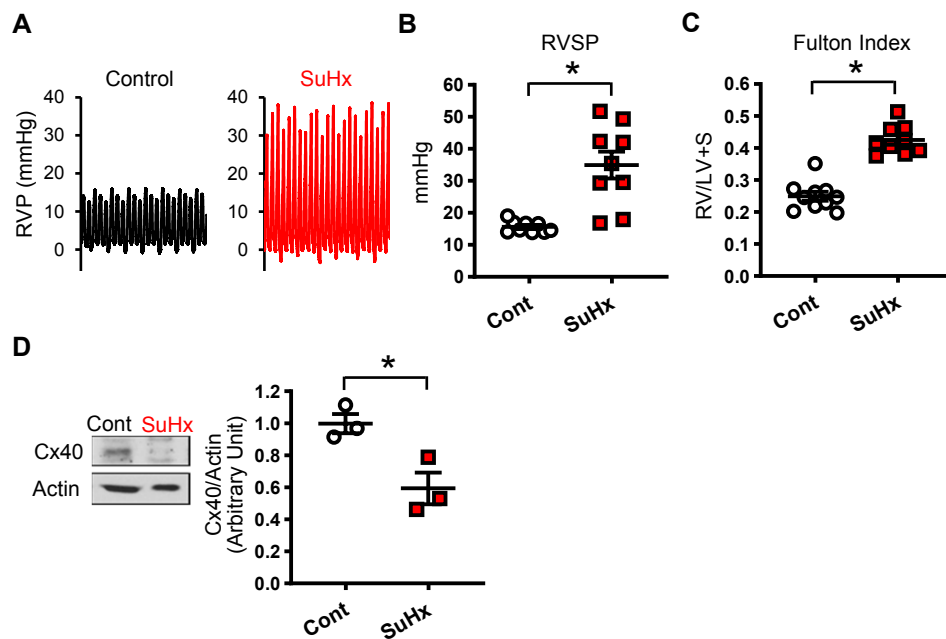

**Figure S2.** Characterization of mice with Sugen-hypoxia (SuHx)-induced pulmonary hypertension (PH). **A:** Typical record of right ventricular pressure (RVP). **B:** Dot plot shows right ventricular systolic pressure (RVSP) in mice exposed to 4wks-Hypoxia and Sugen5416 (SuHx,  $n_{\text{mice}}=9$ ) or control mice for SuHx (Cont,  $n_{\text{mice}}=9$ ). **C:** Fulton Index (RV/LV+S). Cont,  $n_{\text{mice}}=10$ ; SuHx,  $n_{\text{mice}}=9$ . **D:** Cx40 protein levels in mouse pulmonary endothelial cells (MPECs) determined by Western Blot.  $N_{\text{mice}}=3$  per group. Data are mean  $\pm$  SEM.  $*P<0.05$  vs. Cont. Unpaired Student's *t*-test (2-tailed) was used for comparisons of two experimental groups.

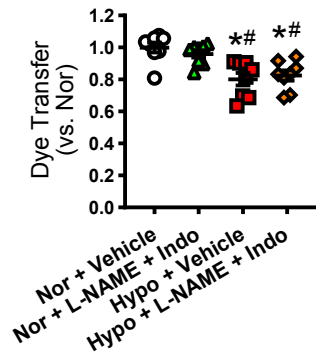

**Figure S3.** Gap junction (GJ) activity in human pulmonary ECs assessed by Lucifer Yellow dye transfer experiment. The dot plot shows summarized data of dye transfer (the distance compared to control) in normoxia-exposed vehicle-treated ECs (Nor + Vehicle), normoxia-exposed L-NAME (an eNOS inhibitor, 10 $\mu$ M) and indomethacin (a cyclooxygenase inhibitor, 100 $\mu$ M)-treated ECs (Nor + L-NAME + Indo), hypoxia-exposed vehicle-treated ECs (Hypo + Vehicle), hypoxia-exposed L-NAME and indomethacin-treated ECs (Hypo + L-NAME + Indo). Inhibitors were added to the cells for 20 min before dye transfer experiment. Experimental number is  $n_{\text{experiments}}=8$  per group. Data are mean  $\pm$  SEM. \* $P<0.05$  vs. Nor + Vehicle. # $P<0.05$  vs. Nor + L-NAME + Indo. Statistical comparison between four groups was made by one-way ANOVA with Bonferroni *post hoc* test.

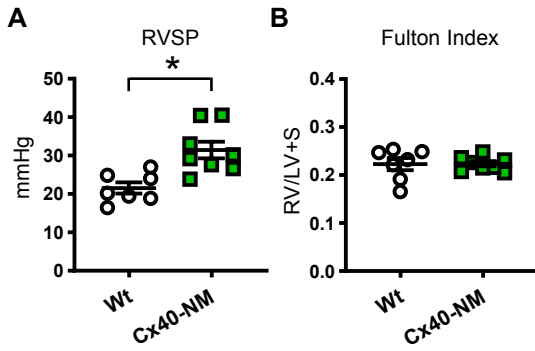

**Figure S4.** Cx40 negative mutant (NM) knock-in mice develops PH. **A:** RVSP. Wild type (Wt),  $n_{\text{mice}}=7$ ; Cx40-NM,  $n_{\text{mice}}=8$ . **B:** Fulton Index (RV/LV+S). Wt,  $n_{\text{mice}}=7$ ; Cx40-NM,  $n_{\text{mice}}=8$ . Data are mean  $\pm$  SEM. \* $P<0.05$  vs. Wt. Unpaired Student's *t*-test (2-tailed) was used for comparisons of two experimental groups.

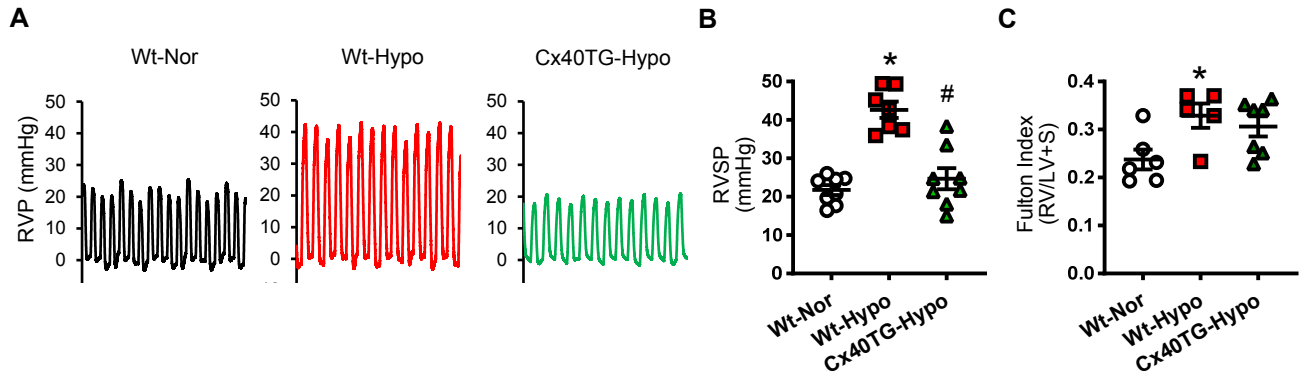

**Figure S5.** Typical record of RVP in normoxia-exposed Wt mice, hypoxia-exposed Wt mice, and hypoxia-exposed Cx40-overexpressing transgenic (Cx40TG) mice. **B:** RVSP. Wt-Nor,  $n_{\text{mice}}=8$ ; Wt-Hypo,  $n_{\text{mice}}=7$ ; Cx40TG-hypo,  $n_{\text{mice}}=8$ . **C:** Fulton Index. Wt-Nor,  $n_{\text{mice}}=6$ ; Wt-Hypo,  $n_{\text{mice}}=5$ ; Cx40TG-hypo,  $n_{\text{mice}}=7$ . Data are mean  $\pm$  SEM. \* $P<0.05$  vs. Wt-Nor. # $P<0.05$  vs. Wt-Hypo. Statistical comparison between three groups was made by one-way ANOVA with Bonferroni *post hoc* test.

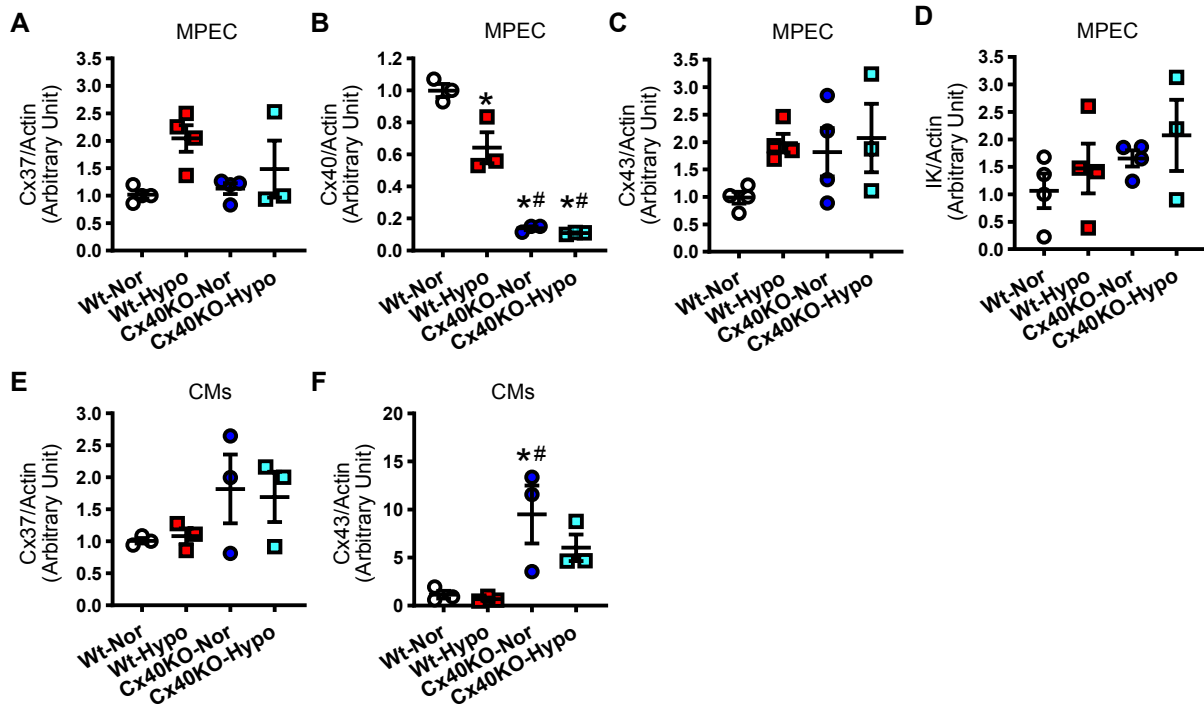

**Figure S6.** Protein levels of Cxs in MPECs (**A-B**) and cardiac myocytes (CMs, **E-F**) isolated from Wt and Cx40KO mice with or without 4wks-hypoxic exposure. **A:** Cx37 in MPECs. **B:** Cx40 in MPECs. **C:** Cx43 in MPECs. **D:** IK levels in MPECs. **E:** Cx37 in CMs. **F:** Cx43 in CMs. CMs were collected from digested heart materials after coronary endothelial cells were removed.  $N_{\text{mice}}=3-4$  per group. Data are mean  $\pm$  SEM. \* $P<0.05$  vs. Wt-Nor. # $P<0.05$  vs. Wt-Hypo. Statistical comparison between four groups was made by one-way ANOVA with Bonferroni *post hoc* test.
